# Supplementary material for: The Challenge to Stabilize, Extract and Analyze Urinary Cell-Free DNA (ucfDNA) during Clinical Routine
Source: MDPI journal article supplement (doi:10.3390/diagnostics13243670), 2023-12-14
Supplement: s1 [file s1]

**Supplementary Table S2.** Overview and analysis of samples used for ddPCR. The table displays sample numbers and corresponding information; the quantity of extracted cfDNA measured with Qubit and the respective cfDNA amount in 7  $\mu$ l used per ddPCR assay; the fractional abundance (FA); the measured concentration in copies/ $\mu$ l and the calculated quantity of cfDNA in ng.

| sample no. | Sample content | Storage conditions | DNA [ng] with Qubit (25 $\mu$ l eluate) | DNA [ng] used per ddPCR assay (7 $\mu$ l) | no. of positive mutant droplets | FA [%] | DNA conc. [copies/ $\mu$ l] measured by ddPCR | Calculated* DNA [ng] per ddPCR assay [ 7 $\mu$ l |
|------------|----------------|--------------------|-----------------------------------------|-------------------------------------------|---------------------------------|--------|-----------------------------------------------|--------------------------------------------------|
| 1          | NC             | No buffer, 0h      | 6.02                                    | 1.69                                      | -                               | -      | 26.60                                         | 1.93                                             |
| 2          | Spike AF 5%    | No buffer, 0h      | 4.16                                    | 1.16                                      | 1; 0                            | 0      | 30.2                                          | 2.20                                             |
| 3          | NC             | UAS, 0h            | 8.89                                    | 2.49                                      | -                               | -      | 47.8                                          | 3.47                                             |
| 4          | Spike AF 5%    | UAS, 0h            | 17.13                                   | 4.80                                      | 25; 23                          | 2.05   | 85.6                                          | 6.50                                             |
| 5          | NC             | UAS, 4h RT         | 9.99                                    | 2.80                                      | NA*                             | -      | -                                             | -                                                |
| 6          | Spike AF 5%    | UAS, 4h, RT        | 19.33                                   | 5.41                                      | 34; 21                          | 2.00   | 112.7                                         | 8.18                                             |
| 7          | NC             | UAS, 4h, F         | 6.99                                    | 1.96                                      | -                               | -      | 48.40                                         | 3.52                                             |
| 8          | Spike AF 5%    | UAS, 4h, F         | 17.90                                   | 5.01                                      | 14; 14                          | 3.20   | 75.95                                         | 5.51                                             |
| 9          | NC             | UAS, 24h, RT       | 15.40                                   | 4.31                                      | -                               | -      | 88.50                                         | 6.43                                             |
| 10         | Spike AF 5%    | UAS, 24h, RT       | 25.33                                   | 7.09                                      | 20                              | 1.90   | 126.40                                        | 9.18                                             |
| 11         | NC             | UAS, 24h, F        | 10.40                                   | 2.91                                      | -                               | -      | 58.50                                         | 4.25                                             |
| 12         | Spike AF 5%    | UAS, 24h, F        | 13.87                                   | 3.88                                      | 19; 30                          | 1.80   | 105.20                                        | 7.64                                             |
| 13         | NC             | AlloU, 0h          | 2.14                                    | 0.60                                      | -                               | -      | 8.05                                          | 0.58                                             |
| 14         | Spike AF 5%    | AlloU, 0h          | 14.47                                   | 4.05                                      | 23; 36                          | 2.95   | 73.1                                          | 5.30                                             |
| 15         | NC             | AlloU, 4h, RT      | 1.69                                    | 0.47                                      | -                               | -      | 6.20                                          | 0.45                                             |
| 16         | Spike AF 5%    | AlloU, 4h, RT      | 8.32                                    | 2.33                                      | 8; 3                            | 2.25   | 41.70                                         | 3.03                                             |
| 17         | NC             | AlloU, 4h, F       | 1.87                                    | 0.52                                      | -                               | -      | 7.1                                           | 0.52                                             |
| 18         | Spike AF 5%    | AlloU, 4h, F       | 11.97                                   | 3.35                                      | 8; 2                            | 2.5    | 16.55                                         | 1.20                                             |
| 19         | NC             | AlloU, 24h, RT     | 3.81                                    | 1.07                                      | -                               | -      | 5.35                                          | 0.39                                             |
| 20         | Spike AF 5%    | AlloU, 24h, RT     | 8.15                                    | 2.28                                      | 0                               | 0      | 32.1                                          | 2.33                                             |
| 21         | NC             | AlloU, 24h, F      | 1.60                                    | 0.45                                      | -                               | -      | 5.60                                          | 0.41                                             |
| 22         | Spike AF 5%    | AlloU, 24h, F      | 13.07                                   | 3.66                                      | 31; 18                          | 2.00   | 73.60                                         | 5.34                                             |
| 23         | NC             | UCB, 0h            | 1.10                                    | 0.31                                      | -                               | -      | 2.0                                           | 0.15                                             |
| 24         | Spike AF 5%    | UCB, 0h            | 3.04                                    | 0.85                                      | 3; 1                            | 0.65   | 9.7                                           | 0.70                                             |
| 25         | NC             | UCB, 4h, RT        | 1.63                                    | 0.46                                      | -                               | -      | 4.25                                          | 0.31                                             |
| 26         | Spike AF 5%    | UCB, 4h, RT        | 1.72                                    | 0.48                                      | 0                               | 0      | 3.15                                          | 0.23                                             |

|    |                          |     |     |        |     |       |      |
|----|--------------------------|-----|-----|--------|-----|-------|------|
| 27 | Ref.<br>Standard<br>0.1% | *** | 2.8 | 1; 0   | 0   | 25.35 | 1.84 |
| 28 | Ref.<br>Standard<br>1%   | *** | 2.8 | 3; 5   | 1.0 | 22.95 | 1.67 |
| 29 | Ref.<br>Standard<br>5%   | *** | 2.8 | 34; 23 | 5.1 | 25.90 | 1.88 |

NA\*: sample could not be analyzed due to insufficient droplet generation.

\*\*Calculated as mentioned above:  $\frac{ng}{assay} = \frac{copies}{\mu l} * 22 \mu l * 0.0033 ng$ .

\*\*\* Reference standard solutions were measured fluorometrically using Qbit resulting in 400ng/ml each.
